1 **Site-specific validation and quantification of RNA 2'-O-methylation**  
2 **by qPCR with RNase H**

3 Yifan Wu<sup>1</sup>, Yao Tang<sup>1</sup>, Yong Li<sup>1</sup>, Xiangwen Gu<sup>1</sup>, Qiang Wang<sup>1\*</sup>, Qihan Chen<sup>1,2\*</sup>

4 1 The State Key Laboratory of Pharmaceutical Biotechnology, School of Life Sciences, Nanjing  
5 University, Nanjing, Jiangsu 210023, China.

6 2 Medical School of Nanjing University, Nanjing, Jiangsu 210093, China.

7 \*Corresponding authors

8 To whom correspondence should be addressed. E-mail: [chenqihan@nju.edu.cn](mailto:chenqihan@nju.edu.cn)

9

10 **ABSTRACT**

11 **RNA 2'-O-methylation, one of the most abundant modifications on RNAs, is**  
12 **crucial for diverse intracellular biological processes. In the past several years,**  
13 **several high-throughput screening methods have been developed, resulting in**  
14 **the identification of thousands of new 2'-O-methylation (Nm) sites. However,**  
15 **due to the high variability in these high-throughput methods, accurate and**  
16 **rapid low-throughput validation assays are needed to confirm and quantify the**  
17 **2'-O-methylation status of screened candidate sites. Although several low-**  
18 **throughput Nm site detection methods have been reported, precise location**  
19 **and quantitative assays are still challenging to achieve. Based on the**  
20 **characteristic that RNase H would be inhibited by Nm modification, we**  
21 **developed Nm-VAQ (site-specific 2'-O-methylation (Nm) Validation and**  
22 **Absolute Quantification resolution). In this study, with multiple tests of**  
23 **reagents and conditions, Nm-VAQ was established with a chimera probe of**  
24 **RNA/DNA, RNase H site-specific cleavage, and qRT-PCR, which demonstrated**  
25 **precise absolute quantification of modification ratios and methylation copy**  
26 **numbers. With the help of Nm-VAQ, the 2'-O-methylation status of 5 sites in**  
27 **rRNA was evaluated.**

28

## 29 INTRODUCTION

30 RNA chemical modifications are pivotal for post-transcriptional regulation of gene  
31 expression. Among these, 2'-O-methylation is one most abundant modification occurring on  
32 the 2'-hydroxyl group of ribose and is present in all major classes of RNA, including rRNA,  
33 tRNA, miRNA, and mRNA (1,2). Since 2'-O-methylation is not a base-limited modification,  
34 it is called Nm (N refers to A/G/C/U)(3). Based on previous studies, Nm is commonly  
35 distributed within conserved regions of rRNA and influences rRNA folding, assembly, and  
36 metabolism by enhancing hydrophobic surfaces and stabilizing helical stem structures(3). In  
37 addition, Nm regulates various biological processes by affecting RNA-RNA and RNA-  
38 protein interactions, including splicing, degradation, translation, and immune recognition(4-  
39 7). Thus, 2-O-methyltransferases and changes to Nm levels are linked to many diseases,  
40 including cancers, autoimmune diseases, and intellectual disability (Genes (Basel) 2019  
41 10(20):117). Given the significance of Nm modifications, the complete distribution map and  
42 regulation mechanism of Nm in different biological contexts warrant further elucidation.

43 To further characterize RNA 2'-O-methylation function, several high-throughput Nm  
44 identification tools have been established, such as 2'OMe-seq, RiboMethSeq, Nm-Seq, and  
45 NJU-seq(8-11). However, although these tools can detect potential Nm sites comprehensively,  
46 the results' ambiguity leads to the significant difficulties of Nm quantification due to potential  
47 false positive and semi-quantification results among the various methods (12-14). Therefore,  
48 an accurate method is required to validate and quantify the Nm sites detected through the  
49 high throughput methods. We developed an RNase H-based site-specific 2'-O-methylation  
50 (Nm) Validation and Absolute Quantification resolution (Nm-VAQ) protocol to address this  
51 problem. RNase H is a non-sequence-specific endonuclease enzyme that catalyzes the  
52 cleavage of RNA in RNA/DNA substrates, but its activity is inhibited by 2'-O-methylated  
53 residues(15). In previous studies, researchers had tried to achieve site-specific cleavage of

54 RNase H by the guidance of an RNA-DNA chimera probe to evaluate potential Nm sites(15).  
55 However, the conclusion of which probe was capable seemed not consistent (15-17). Here,  
56 by testing multiple designs and continuously improving and optimizing, we established Nm-  
57 VAQ by combining RNase H cleavage property and qRT-PCR assay to acquire the absolute  
58 quantification of methylation copy number and the 2'-O-methylation ratio of the target site  
59 (Figure 1). We used Nm-VAQ to evaluate five sites in rRNA of the HeLa cell line, including  
60 18s 159A, 354U, and 1391C (known Nm sites reported in the previous studies), 28s 4109C  
61 (newly discovered Nm site in our recent research), and 18s 1197G (unmethylated sites  
62 reported in previous studies) (11,18).

63

## 64 **MATERIALS AND METHODS**

### 65 **The assay of RNase H cleavage**

66 GenScript Biotech Co. synthesized RNA oligonucleotides and chimera probes. The  
67 sequences of all probes used in this study are listed in Figure 2 and Supplementary Figure 1.  
68 Briefly, 12.5 pmol RNA oligonucleotides were mixed with 75 pmol chimera probe, and then  
69 heated to 95 °C for 2 min, then cooling to 22 °C at 0.1 °C/s, and maintained for 5 min. The  
70 hybrid was reacted with 1 µl RNase H (New England BioLabs) at 37 °C for 30 min and then  
71 heated to 90 °C for 10 min to terminate the reaction. The cleavage products were added to  
72 RNA Dye (New England BioLabs) and then were analyzed by 20% UERA-PAGE,  
73 visualizing by ChemiDoc XRS+ \UnUniversal aHoodII gel imaging system (Bio-rad).  
74 Series reactions were designed to test the duration time, cooling rate, and molar number ratio  
75 of oligonucleotides and chimera probe to improve RNase H-dependent Nm detection.

### 76 **Cell culture and RNA extraction**

77 The HeLa cells were obtained from Shanghai Institute of Cell Biology, Chinese Academy of  
78 Sciences (Shanghai, China). The HeLa cells were grown in Dulbecco's modified eagle  
79 medium (DMEMs) supplemented with 10% fetal bovine serum (FBS), 5% antibiotic at 37 °C  
80 in an incubator containing 5% CO<sub>2</sub>. The cells were lysed by TRIzol (Invitrogen), and total  
81 RNA was extracted following standard protocol. The RNA amount was quantified by  
82 NanoDrop (Thermo Fisher Scientific).

### 83 **Nm-VAQ assay of RNA 2'-O-methylation ratio and copy numbers**

84 GenScript Biotech Co. synthesized synthetic RNA oligonucleotides with/without Nm, and  
85 Sangon Biotech Co. synthesized qRT-PCR primers. All sequences are listed in  
86 Supplementary Table 1. The oligonucleotides with/without Nm were mixed to obtain  
87 gradient 2'-O-methylation ratio substrate. Then the substrate was added to 10 pmol D<sub>(4)</sub>R<sub>(13)</sub>  
88 chimera probe, with 95 °C for 2 min, following by cooling to 22 °C at 0.1 °C/s, and 22 °C for

89 5 min. The products were divided into 2 parts for the following reaction. One mixture  
90 contained 5  $\mu$ l previous product, 1  $\mu$ l RNase H (New England BioLabs), 1  $\mu$ l 10X RNase H  
91 Reaction Buffer, and 3  $\mu$ l RNase-free H<sub>2</sub>O. RNase H storage buffer was substituted for  
92 RNase H to form the other mixture to serve as a blank control, followed by 30 min at 37 °C  
93 and 10 min at 90 °C. The products were diluted for 50-folds and then were used to obtain  
94 cDNA by HiScript II 1st Strand cDNA Synthesis Kit (Vazyme biotech co., ltd.). cDNA was  
95 diluted for 100-folds, and then qPCR was conducted in 20  $\mu$ l reaction mixture containing 10  
96  $\mu$ l ChamQ Universal SYBR qPCR Master Mix (Vazyme biotech co., ltd.), 0.4  $\mu$ l F primer,  
97 0.4  $\mu$ l R primer, 2  $\mu$ l cDNA, and 7.2  $\mu$ l H<sub>2</sub>O, following the protocol: 30s at 95 °C, then 40  
98 cycles of 95 °C for 10s and 60°C for 30s. Each cDNA was analyzed in 3 replicates. Nm ratio  
99 was calculated by  $\Delta$ CT (Cycle Threshold) of RNase H reaction and control, and CT of RNase  
100 H reaction obtained methylation copy number.

#### 101 **Quantitation of HeLa rRNA Nm ratio by Nm-VAQ**

102 All primers were obtained from Sangon Biotech Co, and the sequences were shown in  
103 Supplementary Table 2. 100 ng HeLa RNA and 10 pmol chimera probes were hybridized,  
104 followed by RNase H cleavage, reverse transcription, and qPCR according to the above Nm-  
105 VAQ protocol. The qPCR protocol changed the Nm detection of 18S rRNA 1391C sites with  
106 an extension temperature of 55°C in the qPCR protocol.  $\Delta$ CT calculated the ratio of  
107 modification according to the Nm-VAQ standard curve.

#### 108 **Quantitation of HeLa rRNA Nm ratio by RTL-P method**

109 Two sets of primers were designed for the site, with the Fu forward primer located upstream  
110 of the Nm site and the Fd forward primer located downstream of the Nm site. All the  
111 sequences were shown in Supplementary Table 3. The high dNTPs concentration reaction  
112 mixture consisted of 5 $\times$  RT Buffer 4  $\mu$ l, M-MLV (H-) Reverse Transcriptase (200 U/ $\mu$ L) 1 $\mu$ l,  
113 RNase inhibitor (40 U/ $\mu$ L) 1 $\mu$ l, RNA 100 ng, RT primer (10  $\mu$ M) 1  $\mu$ l, 8  $\mu$ l RNase -free H<sub>2</sub>O,

114 dNTPs (1 mM each) 1  $\mu$ l. The low dNTPs concentration reaction mixture was replaced by  
115 dNTPs (2  $\mu$ M each). Then the mixtures were incubated at 45 °C for 1 hour and 85 °C for 2  
116 min. The cDNA was diluted 100-fold and subsequently subjected to qPCR reactions, with  
117 both Fu and Fd products amplified for each cDNA. RT efficiency and RT fold change were  
118 calculated according to the following strategy. RT efficiency=template amount measured by  
119 Fu and R/template amount measured by Fd and R. RT fold change=RT efficiency with low  
120 dNTPs/RT efficiency with high dNTPs(14).

121

## 122 **Results**

### 123 **Screening guide chimera with anchored cleavage sites at the Nm residues**

124 Previously, Inoue and Lapham proposed two types of RNA-DNA chimera to apply site-  
125 specific cleavage of target RNA, RNA-DNA-RNA (RDR) and DNA-RNA (DR)(16,17), and  
126 all RNA of chimera were 2'-O-methylated to improve stability (Figure 2A).

127 We started from different chimera structures to determine which one anchors the cleavage at  
128 the targeted Nm site. A pair of synthesized FAM-labeled 30nt ssRNAs, which contained 2'-  
129 O-methylated/unmethylated A at position 22nt, were used as substrates (Figure 2B). First, we  
130 adjusted the number of RNA of the 5' end of chimera probes, including R<sub>(2)</sub>DR (with two  
131 ribonucleotides at 5' end), R<sub>(1)</sub>DR (with one ribonucleotide at 5' end). Substrates were gently  
132 hybridized with the chimera at slowly cooling temperature to form a hybrid strand, then  
133 incubated with RNase H and detected by electrophoresis (see Methods). Although both  
134 R<sub>(1)</sub>DR and R<sub>(2)</sub>DR chimera probes induced specific cleavage sites on the unmethylated  
135 substrate and produced 22nt products, they were not inhibited by 2'-O-methylation  
136 completely, resulting in the production of 23nt cleavage products as well (Figure 2B), which  
137 seemed not consistent with previous studies (15-17). On the other hand, a design of chimera  
138 probe with only DR (without ribonucleotide at 5' end) demonstrated clear site-specific  
139 cleavage on the unmethylated substrate but not 2'-O-methylation substrates. Similar results  
140 were also shown in the cleavage of another two RNA substrates (Supplementary Figure 1).  
141 Therefore, the DR structure was chosen for further modifications in subsequent experiments.

142 The next question was whether the length of the deoxyribonucleotide part determines the  
143 cleavage site since this conclusion was not consistent in previous studies. Based on the results  
144 of D<sub>(3)</sub>R to D<sub>(5)</sub>R, cleavage activity of probes D<sub>(3)</sub>R and D<sub>(4)</sub>R were completely inhibited by  
145 2'-O-methylation (Figure 2C). Due to the higher stability of DNA over RNA, D<sub>(4)</sub>R was  
146 chosen for subsequent testing. In addition, the length of the ribonucleotide part was also



147 essential to determine the binding specificity and affinity of the DR chimera probe. To  
148 optimize the best length, we performed a similar test from  $D_{(4)}R_{(11)}$  to  $D_{(4)}R_{(14)}$ . As shown in  
149 Figure 2D, there was no significant difference in cleavage sites or cleavage efficiency among  
150 tests with different chimera probes. In principle, the longer length of R required a higher  
151 melting temperature, facilitating the test of Nm sites in strong secondary structural regions.

152

### 153 **RNase H-dependent Nm detection with site-specificity and Nm-modification specificity**

154 To further evaluate the effect of Nm around the cleavage site, we applied the assay with RNA  
155 substrate with Nm positioned on 1 nt downstream or upstream of the target ribonucleotide.  
156 As shown in Figure 2E, RNase H activity was inhibited by 2'-O-methylation of the target and  
157 1 nt downstream ribonucleotide but not the upstream one. Thus, the combination use of  
158 chimera probes of targeting adjacent ribonucleotides can locate the accurate position of the  
159 Nm site.

160 So far, more than a hundred RNA modifications have been identified, most of which  
161 occurred on bases. To further confirm RNase H cleavage activity was only sensitive to Nm,  
162 we tested  $m^6A$ , another widely distributed RNA modification, with DR chimera probe and  
163 RNase H. As expected, the  $m^6A$ -containing substrate was cleaved by RNase H at the  
164 modification site, while Am inhibited the cleavage completely (Figure 2F).

165

### 166 **Improved RNase H-dependent Nm detection**

167 We optimized the conditions since RNase H cleavage is crucial for discriminating 2'-O-  
168 methylated RNA from unmethylated RNA molecules. To achieve the full substrate-probe  
169 hybrid at the first and also critical step, 10 times more probe was added to the reaction,  
170 followed by a denaturing step of 95 °C for 2 min and a slow cooling step from 95 °C to 22 °C  
171 at 0.1 °C /s. The substrates were cleaved entirely in the different denaturation time gradients,

172 indicating that these treatments were sufficient (Supplementary Figure 2A). To avoid RNA  
173 being damaged under prolonged high temperatures, we chose denaturation at 95 °C for 2 min  
174 to form a hybridization duplex. After treatments with the same denaturation condition, all  
175 slow cooling from 95 °C to 22 °C allows RNase H to hydrolyze completely (Supplementary  
176 Figure 2B). In addition, the molar ratio of RNA substrate and chimera probe was also tested.  
177 When the molar ratio reached 1:1, RNase H's substrates were wholly digested  
178 (Supplementary Figure 2C). As the more complex structure of RNA in biological samples,  
179 the slow cooling of 0.1 °C /s and the 1:10 ratio of substrate and probe were chosen for  
180 subsequent analysis.

181

### 182 **Construction of Nm-VAQ, a tool for Nm quantitative detection**

183 Although several Nm detection and validation methods have been reported previously, the  
184 Nm quantitative detection is still challenging to achieve, especially on low-content RNAs or  
185 low-modified sites. To establish an accurate quantification tool, we applied RNase H  
186 cleavage directed by chimera and qRT-PCR combination, named Nm-VAQ (Nm Validation  
187 and Absolute Quantification method).

188 Synthetic RNA oligos used in the previous tests were mixed with multiple ratios to assess  
189 whether Nm-VAQ can effectively determine the Nm ratio on partially methylated sites. As  
190 shown in the schematic (Figure 1), the sample was divided into two parts to incubate  
191 with/without RNase H after forming the RNA-chimera hybrid. The total target RNA copy  
192 number can be calculated by Ct value (Cycle threshold) without RNase H treatment, while  
193 the 2'-O-methylation ratio can be acquired from the  $\Delta$ CT of two reactions. A highly  
194 correlated linear curve of 2'-O-methylation ratio and  $\Delta$ CT was obtained ( $R^2 > 0.99$ , Linear  
195 Regression Analysis), indicating that Nm-VAQ can quantify the Nm ratio accurately (Figure  
196 3A). Although most previous Nm quantification methods demonstrated good performance on

197 the Synthetic RNA, one of the most challenging points was the unknown  
198 amount/concentration of target RNA, which varied the result. We tested 50% Nm ratio  
199 substrate with 1 pmol, 0.1 pmol, 0.01 pmol, and 0.001 pmol concentration. Nm-VAQ  
200 demonstrated consistent results with no significant difference around 50% (Figure 3B).  
201 Furthermore, the copy numbers of substrates seemed quite linear after RNase H cleavage,  
202 which proved that RNase H would not cleave 2'-O-methylated substrates even at shallow  
203 concentrations (Figure 3C).

204

### 205 **Quantitative detection of HeLa rRNA Nm status by Nm-VAQ**

206 Now, we started to use Nm-VAQ to evaluate five sites in HeLa rRNA, including four  
207 previously reported 2'-O-methylation sites, 18S 159Am, 354Um, 1391Cm (3), a newly  
208 discovered site 28S 4109Cm (11), and an unmethylated sites as a negative control, 18S 1197  
209 G. Meanwhile, we collected HeLa cells from 4 different sources to observe whether these  
210 rRNA Nm sites were conserved. As demonstrated in the results, 18S 159A and 1391C were  
211 highly Nm-modified throughout different HeLa cell strains with 80-100% 2'-O-methylation  
212 ratio, consistent with other methods results(3,18). Interestingly, the 18S 354U methylation  
213 ratio was from 17.7% to 37.8%, which was detected as unmethylated by some previous  
214 reports while methylated by other tools(3). In addition, the newly found 28S 4109C was  
215 turned out to be 2'-O-methylated from 69.5%-84.1% ratio among different strains, which  
216 confirmed its 2'-O-methylation status (Figure 4). Finally, as a negative control, 18S 1197 G  
217 presented a barely detected signal, again proving the accuracy of Nm-VAQ (Figure 4).

218

## 219 **Discussion**

220 Several previously developed low-throughput Nm detection methods, including LC-MS,  
221 RTL-P, and DNA polymerase, have various defects. LC-MS is labor-intensive and difficult  
222 for mRNA Nm detection due to the requirement for many RNA molecules(13). Both RTL-P  
223 and DNA polymerase relied on the blocking of Nm on reverse transcription, which can be  
224 called RT-based methods(12,14). As the schematic illustrates, any Nm site between the  
225 amplification products will generate a methylation signal, and thus these two detections are  
226 non-site-specific methods (Supplementary Figure 3). Meanwhile, although both RTL-P and  
227 DNA polymerase methods could acquire linear results correlated with methylation ratio with  
228 synthetic RNA, the result varied with different amounts of target RNA. In the RTL-P method,  
229 RT-fold change is negatively correlated with the Nm amount, but cannot indicate the absolute  
230 proportion of the modification(14). In addition, the original study of RTL-P mentioned the  
231 false positive and negative results, which may be caused by RNA secondary structure that  
232 can occur on several rRNA sites(14). Compared to those methods, Nm-VAQ demonstrated  
233 apparent advantages. Nm-VAQ anchored the cleavage position to target site directing by  
234 chimera probe and discriminated 2'-O-methylated RNA from unmethylated RNA molecules  
235 by RNase H. This method acquired the absolute amount of the accurate 2'-O-methylation of  
236 target site simultaneously. In addition, Nm-VAQ showed its capability to consistently  
237 evaluate targets with low amounts or low methylation ratios, which was critical for the study  
238 of mRNA and other RNAs.

239 Our study systematically explores how RNase H, chimera probe, and substrate determined  
240 the cleavage site. By testing different chimera structures of DNA and RNA combination, we  
241 concluded to anchor the RNase H cleavage site with  $D_{(4)}R_{(13)}-(Nm)$ . It was interesting to see  
242 RNase H prefer to cleave RNA substrate 4 nt upstream from the DNA-RNA boundary of the  
243 chimera probe. In future studies, the cleavage molecular mechanism of such unnatural hybrid

244 nucleotides might be explained by a co-crystal structure of RNA substrate, chimera probe,  
245 and inactivated RNase H protein.

246 The results of HeLa cell were worth further exploration. With the help of Nm-VAQ, the 2'-O-  
247 methylation status of HeLa rRNA sites was not consistent. For example, 18S 1391C showed  
248 ~100% 2'-O-methylation in HeLa cell 1, but only ~80% in HeLa cell 2 and 3; 18S 354U  
249 showed ~20% 2'-O-methylation in HeLa cell 1, but ~40% in HeLa cell 2. As reported in  
250 several recent articles, the 2'-O-methylation status of HeLa rRNA sites varied due to strain  
251 difference, growth conditions, and genomic instability(18,19). Although the role of various  
252 modification status of these Nm sites is unknown, it may contribute to ribosome population  
253 heterogeneity further to impact translation. Nm-VAQ provided a solution to access the study  
254 of this direction.

255

256 **Funding:** This work was supported by the Fundamental Research Funds for the Central  
257 Universities 021414380507 and National Natural Science Foundation of China 31801065.

258

259 **Competing interests:** The authors declare no competing interests.

260

261

262 **Reference**

- 263 1. Zhao, B.S., Roundtree, I.A. and He, C. (2017) Post-transcriptional gene regulation by  
264 mRNA modifications. *Nat Rev Mol Cell Biol*, **18**, 31-42.
- 265 2. Roundtree, I.A., Evans, M.E., Pan, T. and He, C. (2017) Dynamic RNA  
266 Modifications in Gene Expression Regulation. *Cell*, **169**, 1187-1200.
- 267 3. Ayadi, L., Galvanin, A., Pichot, F., Marchand, V. and Motorin, Y. (2019) RNA ribose  
268 methylation (2'-O-methylation): Occurrence, biosynthesis and biological functions.  
269 *Biochim Biophys Acta Gene Regul Mech*, **1862**, 253-269.
- 270 4. Elliott, B.A., Ho, H.T., Ranganathan, S.V., Vangaveti, S., Ilkayeva, O., Abou Assi, H.,  
271 Choi, A.K., Agris, P.F. and Holley, C.L. (2019) Modification of messenger RNA by  
272 2'-O-methylation regulates gene expression in vivo. *Nat Commun*, **10**, 3401.
- 273 5. Ge, J., Liu, H. and Yu, Y.T. (2010) Regulation of pre-mRNA splicing in *Xenopus*  
274 oocytes by targeted 2'-O-methylation. *RNA*, **16**, 1078-1085.
- 275 6. Motorin, Y. and Helm, M. (2010) tRNA stabilization by modified nucleotides.  
276 *Biochemistry*, **49**, 4934-4944.
- 277 7. Zust, R., Cervantes-Barragan, L., Habjan, M., Maier, R., Neuman, B.W., Ziebuhr, J.,  
278 Szretter, K.J., Baker, S.C., Barchet, W., Diamond, M.S. *et al.* (2011) Ribose 2'-O-  
279 methylation provides a molecular signature for the distinction of self and non-self  
280 mRNA dependent on the RNA sensor Mda5. *Nat Immunol*, **12**, 137-143.
- 281 8. Krogh, N., Jansson, M.D., Hafner, S.J., Tehler, D., Birkedal, U., Christensen-  
282 Dalsgaard, M., Lund, A.H. and Nielsen, H. (2016) Profiling of 2'-O-Me in human  
283 rRNA reveals a subset of fractionally modified positions and provides evidence for  
284 ribosome heterogeneity. *Nucleic Acids Res*, **44**, 7884-7895.
- 285 9. Marchand, V., Blanloeil-Oillo, F., Helm, M. and Motorin, Y. (2016) Illumina-based  
286 RiboMethSeq approach for mapping of 2'-O-Me residues in RNA. *Nucleic Acids Res*,  
287 **44**, e135.
- 288 10. Dai, Q., Moshitch-Moshkovitz, S., Han, D., Kol, N., Amariglio, N., Rechavi, G.,  
289 Dominissini, D. and He, C. (2017) Nm-seq maps 2'-O-methylation sites in human  
290 mRNA with base precision. *Nat Methods*, **14**, 695-698.
- 291 11. Tang, Y., Wu, Y., Xu, R., Gu, X., Wu, Y., Chen, J.-Q., Wang, Q. and Chen, Q. (2020)  
292 Identification and exploration of 2'-O-methylation sites in rRNA and mRNA with a  
293 novel RNase based platform. *bioRxiv*.
- 294 12. Aschenbrenner, J. and Marx, A. (2016) Direct and site-specific quantification of RNA  
295 2'-O-methylation by PCR with an engineered DNA polymerase. *Nucleic Acids Res*,  
296 **44**, 3495-3502.
- 297 13. Douthwaite, S. and Kirpekar, F. (2007) Identifying modifications in RNA by MALDI  
298 mass spectrometry. *Methods Enzymol*, **425**, 3-20.
- 299 14. Dong, Z.W., Shao, P., Diao, L.T., Zhou, H., Yu, C.H. and Qu, L.H. (2012) RTL-P: a  
300 sensitive approach for detecting sites of 2'-O-methylation in RNA molecules. *Nucleic  
301 Acids Res*, **40**, e157.
- 302 15. Yu, Y.T., Shu, M.D. and Steitz, J.A. (1997) A new method for detecting sites of 2'-O-  
303 methylation in RNA molecules. *RNA*, **3**, 324-331.
- 304 16. Inoue, H., Hayase, Y., Iwai, S. and Ohtsuka, E. (1987) Sequence-dependent  
305 hydrolysis of RNA using modified oligonucleotide splints and RNase H. *FEBS Lett*,  
306 **215**, 327-330.
- 307 17. Lapham, J. and Crothers, D.M. (1996) RNase H cleavage for processing of in vitro  
308 transcribed RNA for NMR studies and RNA ligation. *RNA*, **2**, 289-296.
- 309 18. Erales, J., Marchand, V., Panthu, B., Gillot, S., Belin, S., Ghayad, S.E., Garcia, M.,  
310 Laforets, F., Marcel, V., Baudin-Baillieu, A. *et al.* (2017) Evidence for rRNA 2'-O-

311 methylation plasticity: Control of intrinsic translational capabilities of human  
312 ribosomes. *Proc Natl Acad Sci U S A*, **114**, 12934-12939.  
313 19. Sloan, K.E., Warda, A.S., Sharma, S., Entian, K.D., Lafontaine, D.L.J. and Bohnsack,  
314 M.T. (2017) Tuning the ribosome: The influence of rRNA modification on eukaryotic  
315 ribosome biogenesis and function. *RNA Biol*, **14**, 1138-1152.  
316



## 317 **Figures legends**

318 **Figure 1 Schematic workflow of Nm-VAQ.** 1) the hybrid of RNA and chimera probes. The  
319 red site in substrate indicated the target site was 2' -O-methylated, and the green site  
320 indicated the unmethylated site. The reddish-brown region of chimera probe showed the  
321 DNA, and the baby blue region showed the RNA with Nm modification; 2) with/without  
322 RNase H cleavage; 3) RT-qPCR. Methylation copy number was calculated by CT (Cycle  
323 Threshold) of RNase H reaction. Methylation ratio was from  $\Delta$ CT of RNase H cleavage and  
324 control sample. The box on the right showed an example of RNase H cleavage directed by  
325 the chimera probe in the following tests.

326

327 **Figure 2 Screening chimera probe for RNase H-dependent Nm detection.** (A) Schematic  
328 presentation of hybrid of RNA oligonucleotides (up sequences) and chimera probes (down  
329 sequences). The red arrow indicated the RNase H cleavage on the previous report(15,17).  
330 The baby blue sites indicated RNA of chimera probes, which all were 2'-O-methylated, and  
331 the reddish-brown sites indicated the DNA of chimera. The following chimeras were labeled  
332 in the same way. (B-F) The exploration of chimera probe structure. The scheme of hybrid  
333 RNA oligonucleotides (up sequences) and chimera probes (down sequences) was shown on  
334 the left. The RNase H reaction products were presented on the right by electrophoresis. The  
335 red sites in the substrates indicated the Nm site, and the red arrows indicated the cleavage  
336 sites. The number presented the length of FAM-labeled cleavage products. (B) Site-specific  
337 cleavage of RNase H directed by RDR or DR chimera. (C) RNase H cleavage directed by DR  
338 chimera with varied DNAs. (D) RNase H cleavage directed by DR chimera with varied RNA  
339 numbers. (E) Effect of 2'-O-methylation positions on RNase H cleavage. N represented the  
340 target site. (F) Effect of m<sup>6</sup>A and Nm modification on RNase H cleavage. The purple site was  
341 an m<sup>6</sup>A-modified site.

342 **Figure 3 The construction of Nm-VAQ.** (A) Correlation of Nm ratio of substrate to  $\Delta$ CT  
343 for Nm-VAQ assay. RNase H-dependent site-specific cleavage and qRT-PCR were combined  
344 to form Nm-VAQ. The 0.1 pmol substrate with and without Nm were mixed to obtain a  
345 known Nm ratio, and  $\Delta$ CT (Cycle Threshold) was from the RNase H treatment and the  
346 control samples. Error bars describe SD (n = 3). (B) Measure of the Nm ratio of four  
347 substrate amounts with known ratios of 50%. The Nm ratio was calculated by  $\Delta$ CT values  
348 according to the above coefficient. Error bars describe SD (n = 3). ns, not significant, Brown-  
349 Forsythe ANOVA test. (C) Linear relationship between substrate amount and the product  
350 cleaved by RNase H. CT values were deprived from 3B.

351

352 **Figure 4 The Nm ratio of HeLa rRNA sites detecting by Nm-VAQ.** 18s rRNA 159A,  
353 354U, and 1391C sites were 2'-O-methylated reported by previous studies. 28s 4109C site  
354 was first discovered with Nm modification detected by NJU-seq. An unmethylated site at 18s  
355 1197G was used as a negative control.

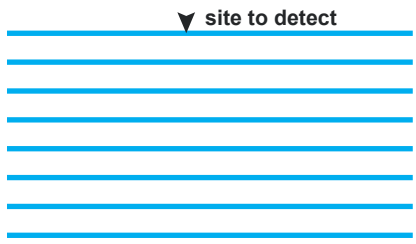

hybridization

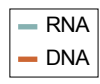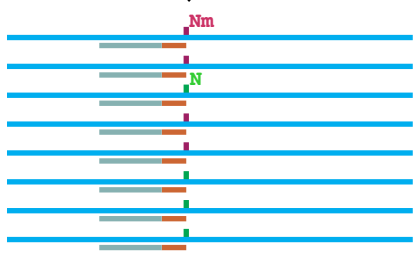

RNase H(+)

RNase H(-)

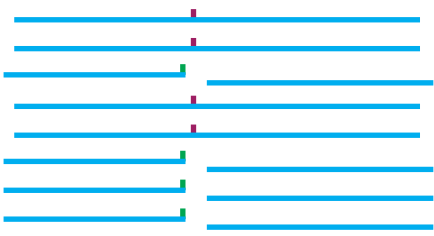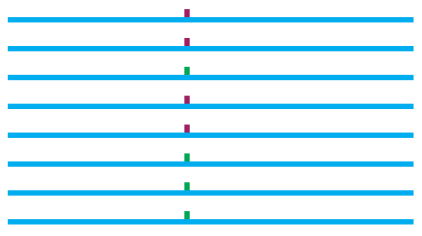

RT-qPCR

RT-qPCR

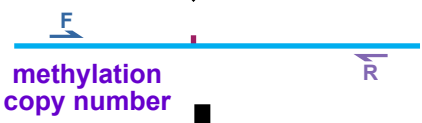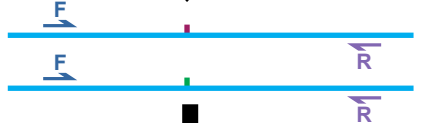

methylation ratio

**Figure 2****A**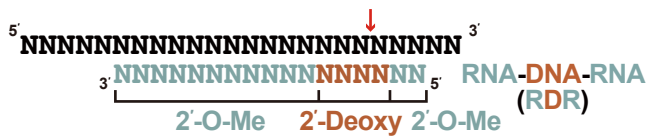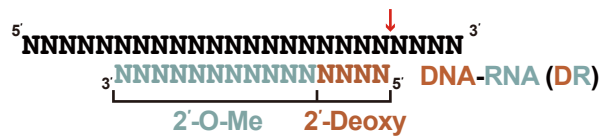**B**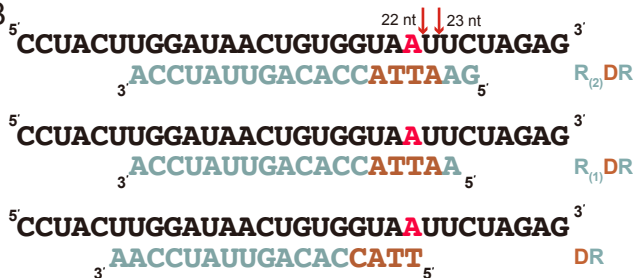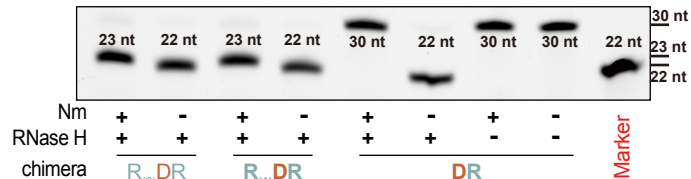**C**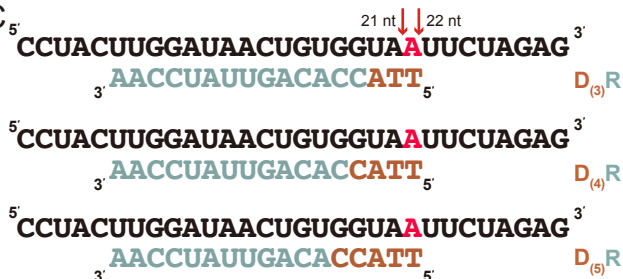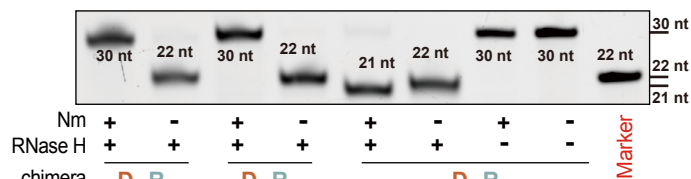**D**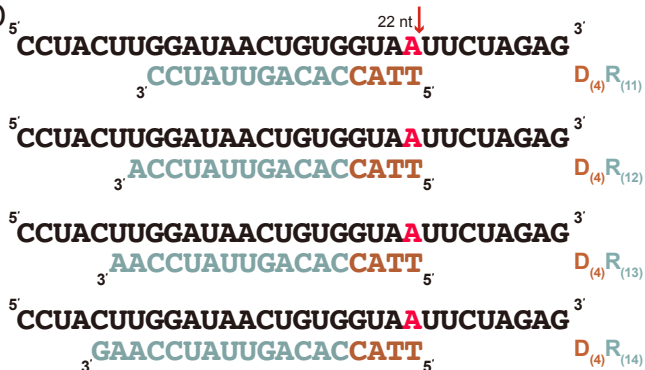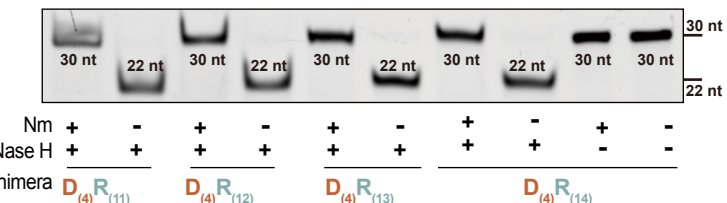**E**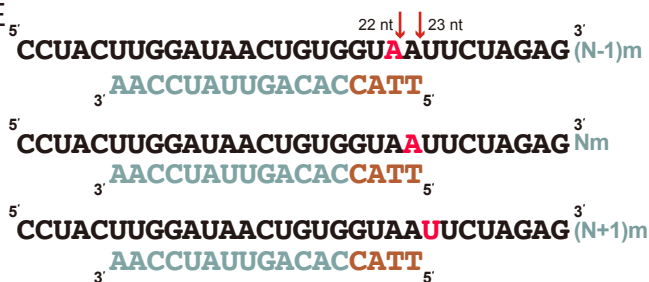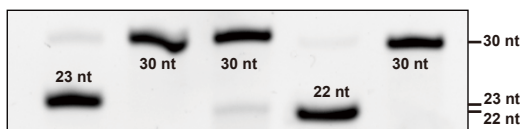**F**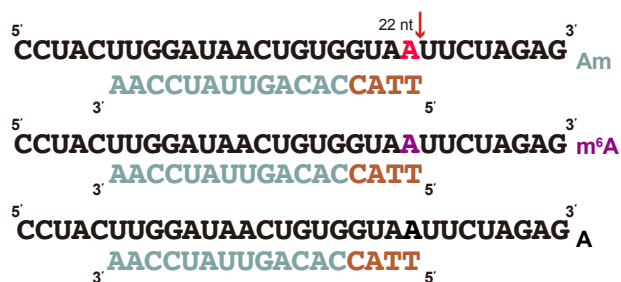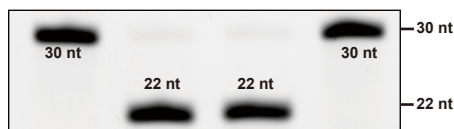

**Figure3**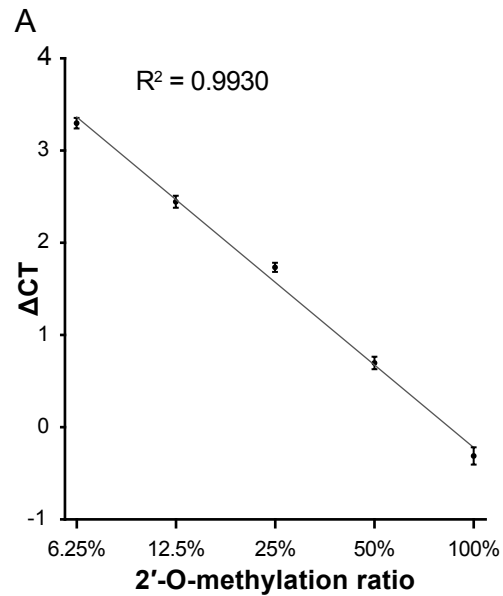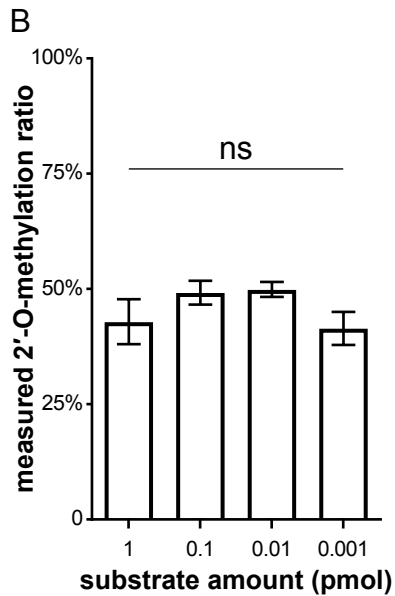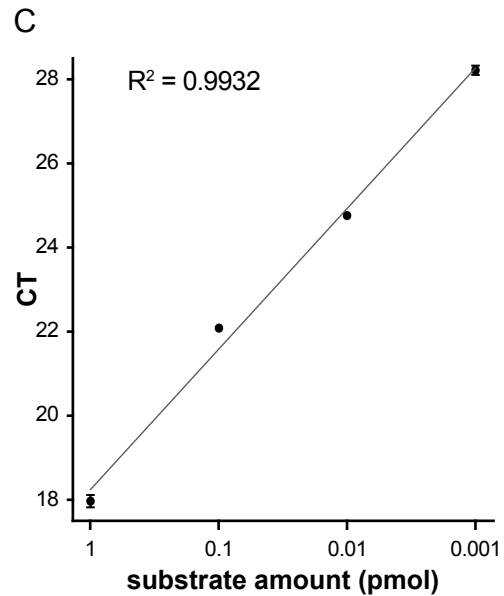

**Figure 4**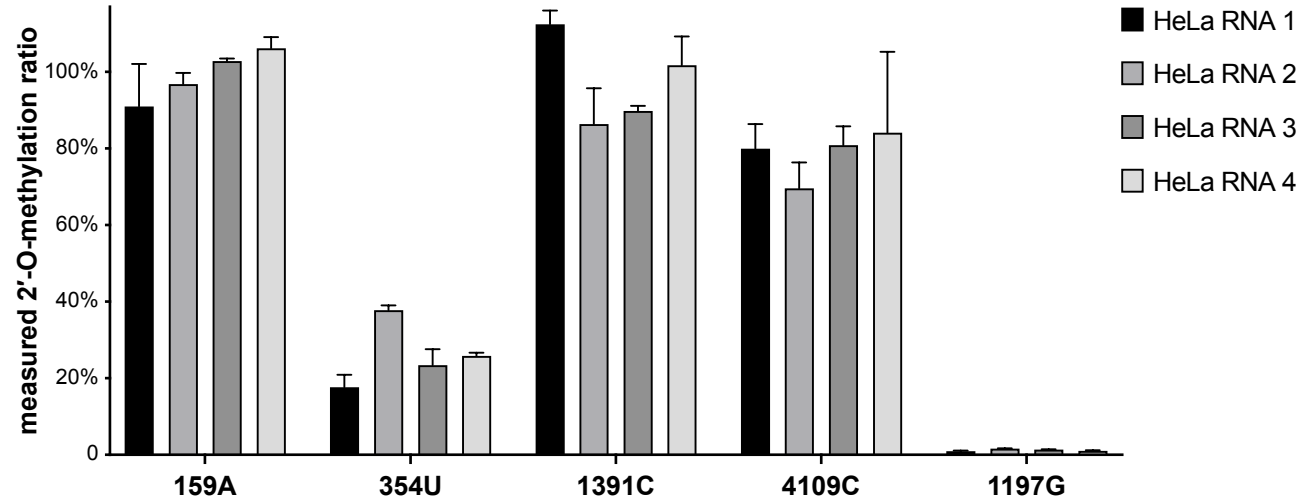

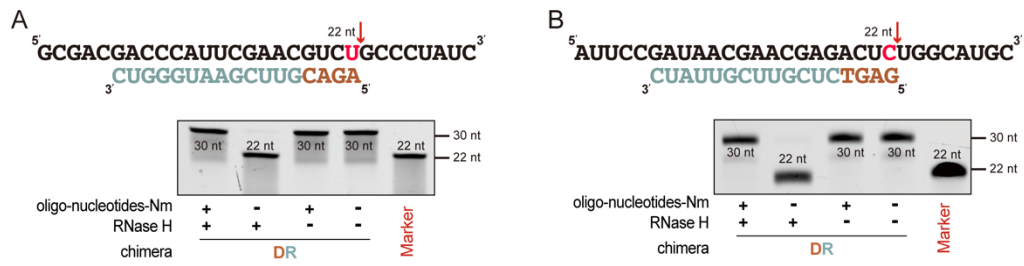

1

2 **Supplementary Figure 1 The RNase H cleavage guided by the DR chimera probe was inhibited**

3 **by 2'-O-methylation.** (A, B) The cleavage of RNase H in the other two oligo-nucleotides. The red

4 sites indicated the Nm site, and the red arrows indicated that the cleavage sites. The number

5 presented the length of FAM-labeled cleavage products.

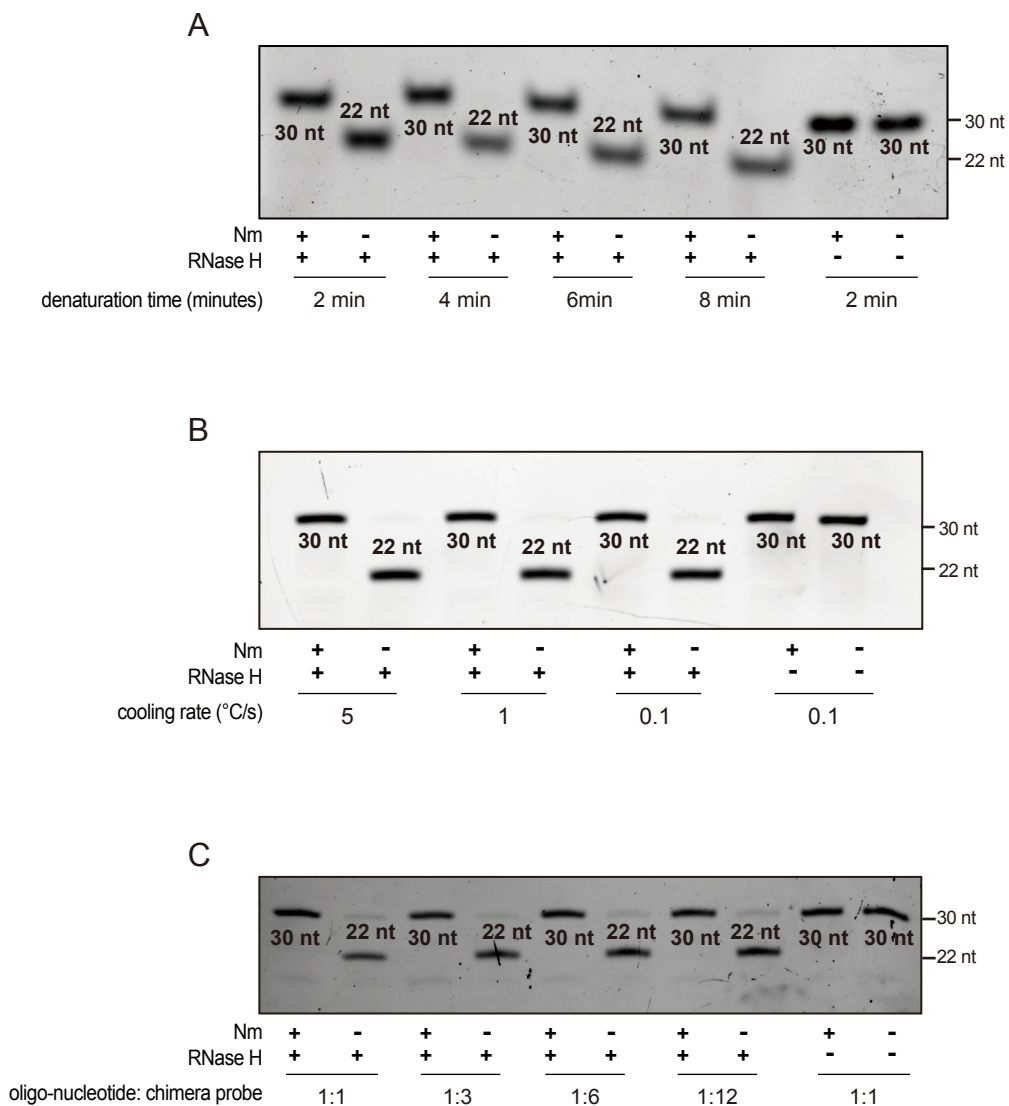

6

7 **Supplementary Figure 2 Exploration of RNase H hydrolysis condition. (A) RNase H cleavage**

8 with different denaturation time at 95°C. (B) RNase H cleavage with different cooling rate from

9 95 °C to 22 °C. (C) RNase H cleavage with a different molar ratio of oligo-nucleotide and chimera

10 probe.



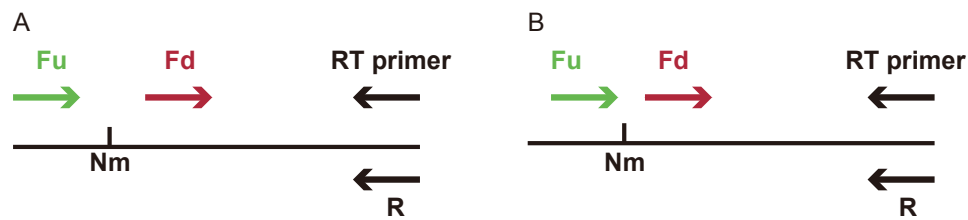

11

12 **Supplementary Figure 3 The schematic of the RT-based methods.** (A) The 2'-O-methylation

13 detection of the RTL-P method(14). The RT (reverse transcription) primer is positioned downstream

14 of Nm site. Two forward primers for the subsequent PCR amplification were designed located either

15 downstream (Fd) or upstream (Fu) of the Nm site. The RT primer was used to be the R primer in

16 PCR amplification. (B) The 2'-O-methylation detection with an engineered DNA polymerase(12).

17 The 3' end of Fu primer was located on 1nt upstream of Nm site, and the 5' end of Fd primer was

18 5-6nt downstream of Fu primer.
